# Supplementary material for: Decreased Hemoglobin Concentration and Iron Metabolism Disorder in Periodontitis: Systematic Review and Meta-Analysis
Source: PubMed Central journal article supplement (PMC7005133; doi:10.3389/fphys.2019.01620), 2020-01-31
Supplement: Data_Sheet_1.pdf [file Data_Sheet_1.pdf]

## Supplementary Material

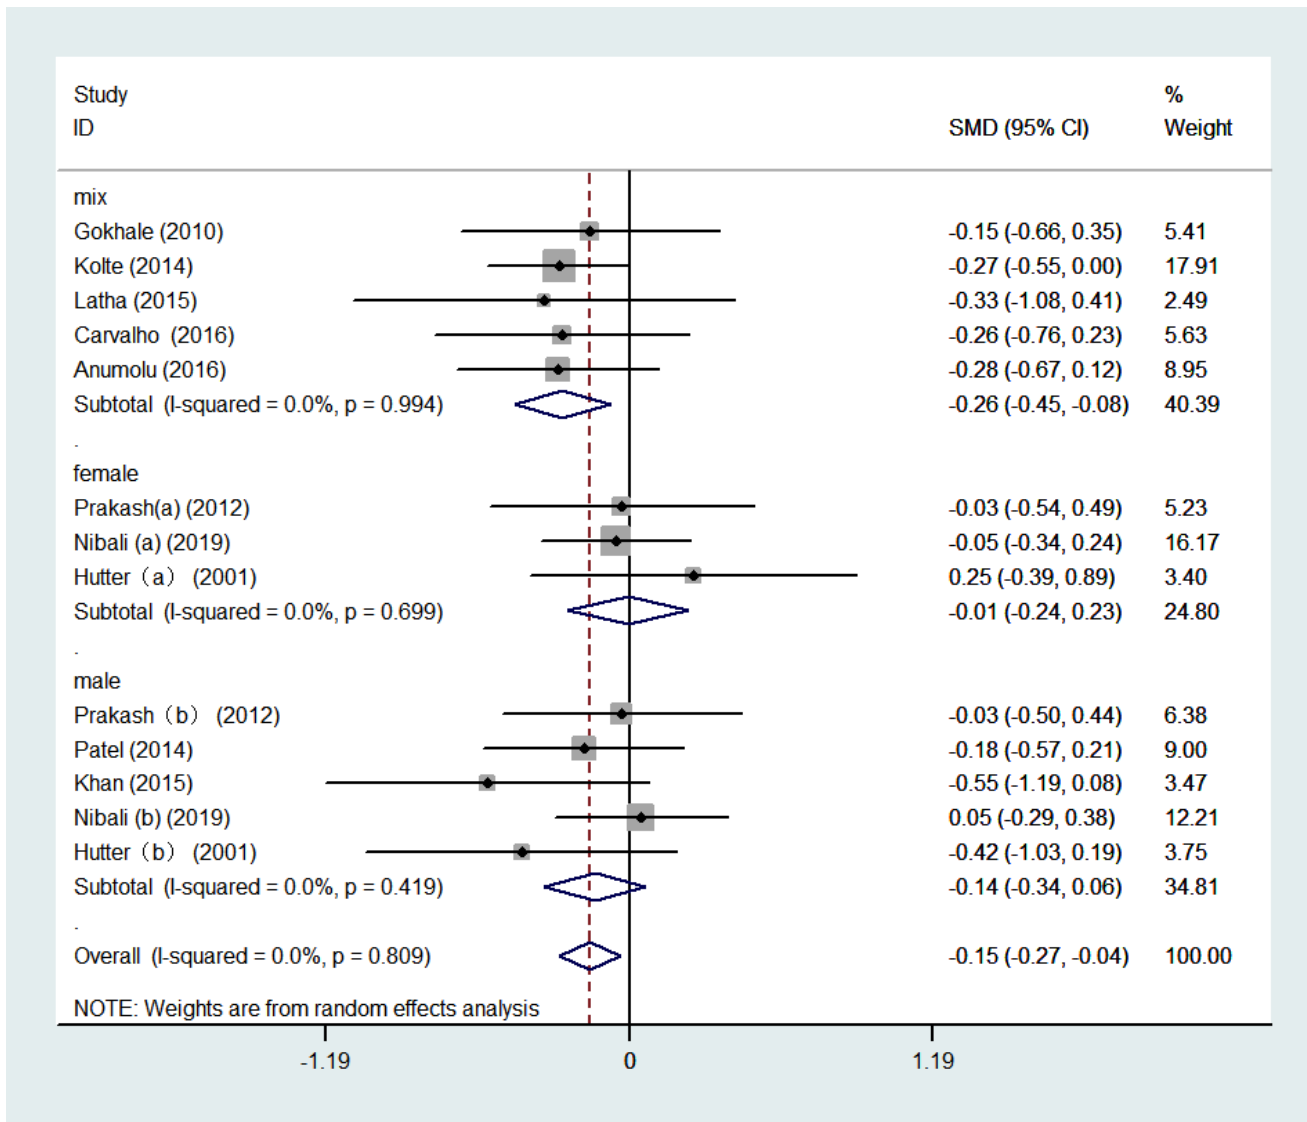

**Supplementary Figure 1.** Forest plot of the studies regarding the effect of periodontitis on MCH based on gender.

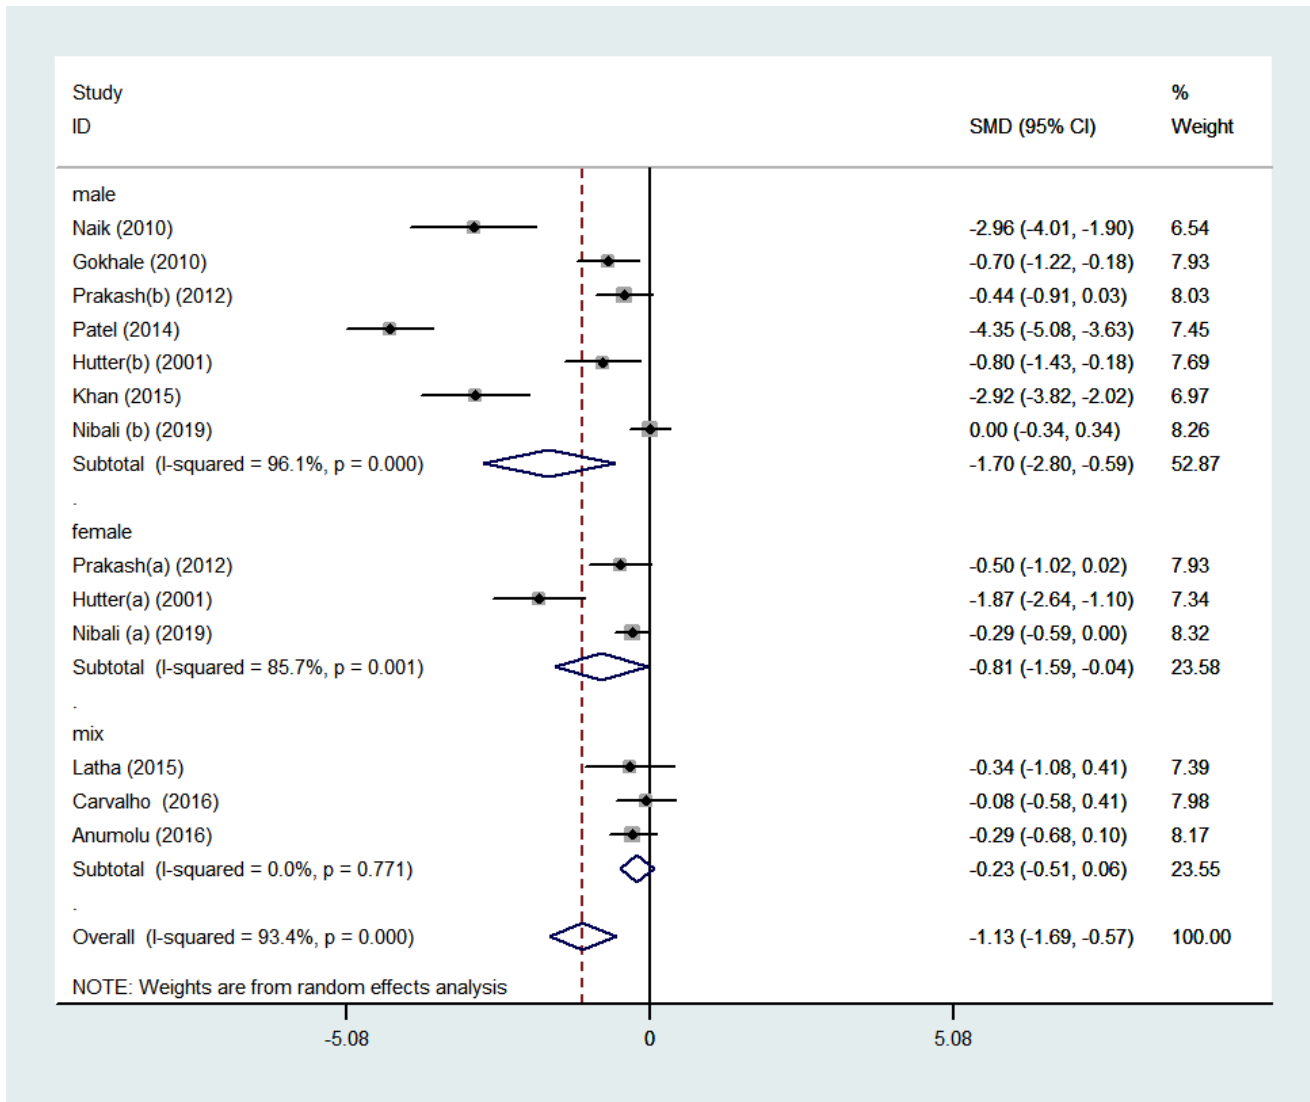

**Supplementary Figure 2.** Forest plot of the studies regarding the effect of periodontitis on HCT based on gender.

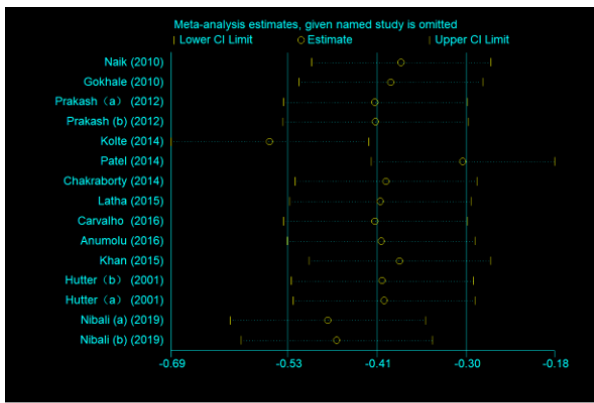

(a)

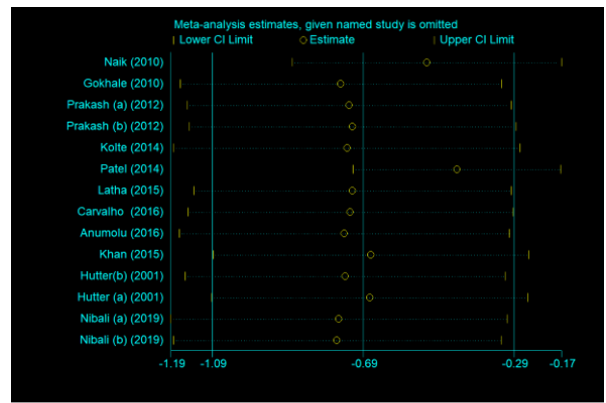

(b)

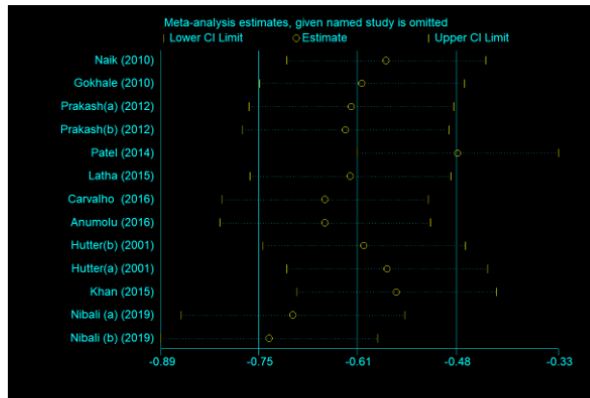

(c)

Supplementary Figure 3. Sensitivity analysis of meta-analysis.

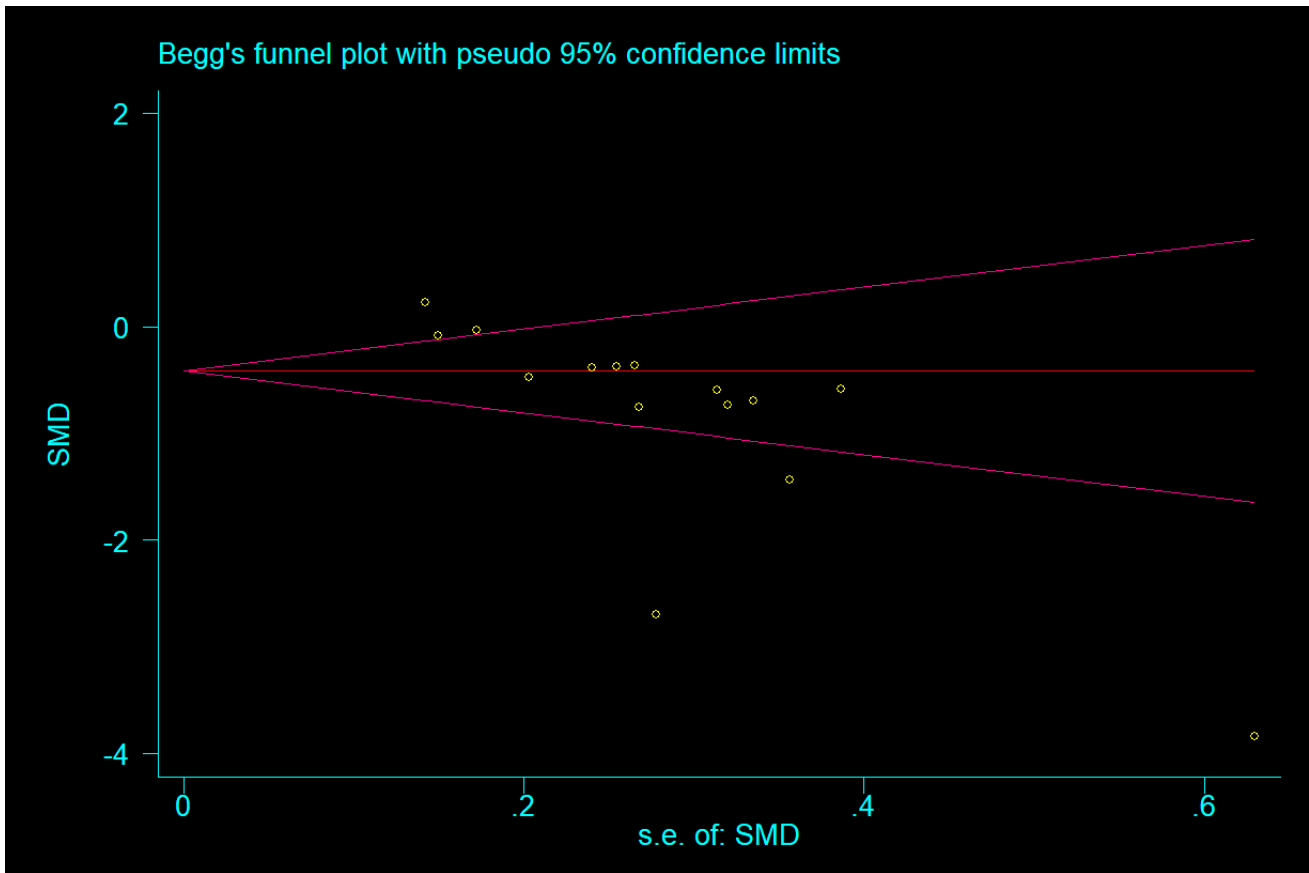

**Supplementary Figure 4.** Publication bias of the studies regarding the effect of periodontitis on Hb level.

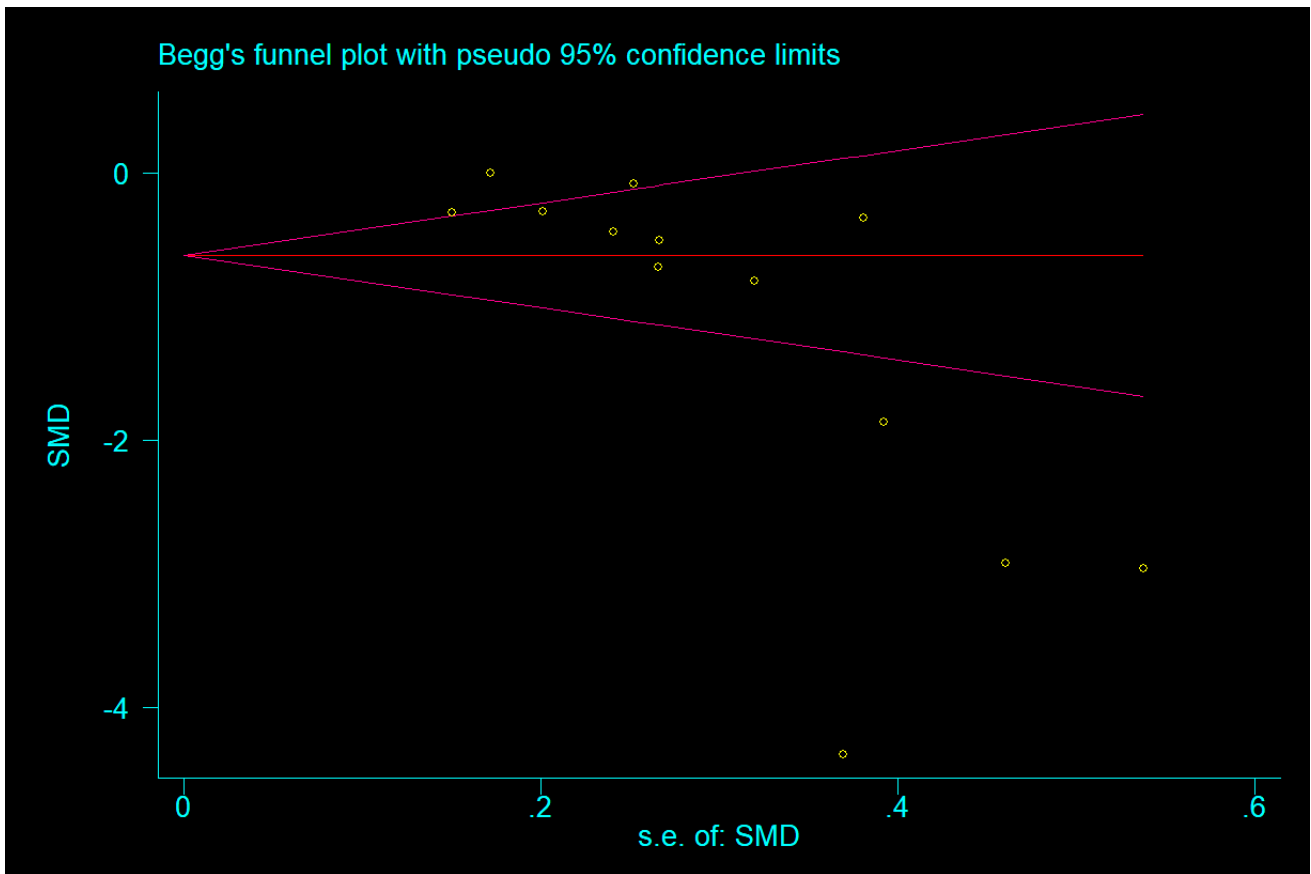

**Supplementary Figure 5.** Publication bias of the studies regarding the effect of periodontitis on HCT level.

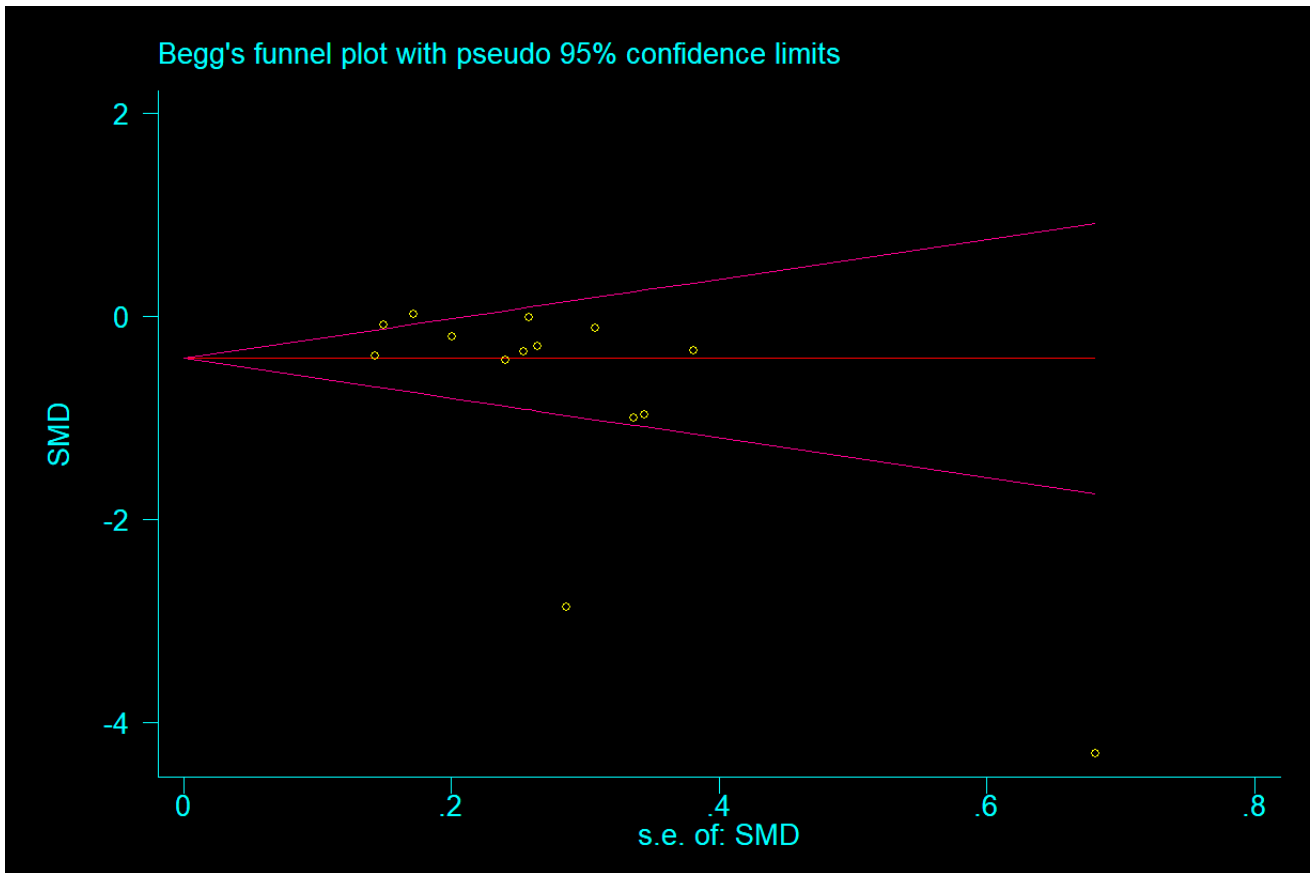

**Supplementary Figure 6.** Publication bias of the studies regarding the effect of periodontitis on RBC level.

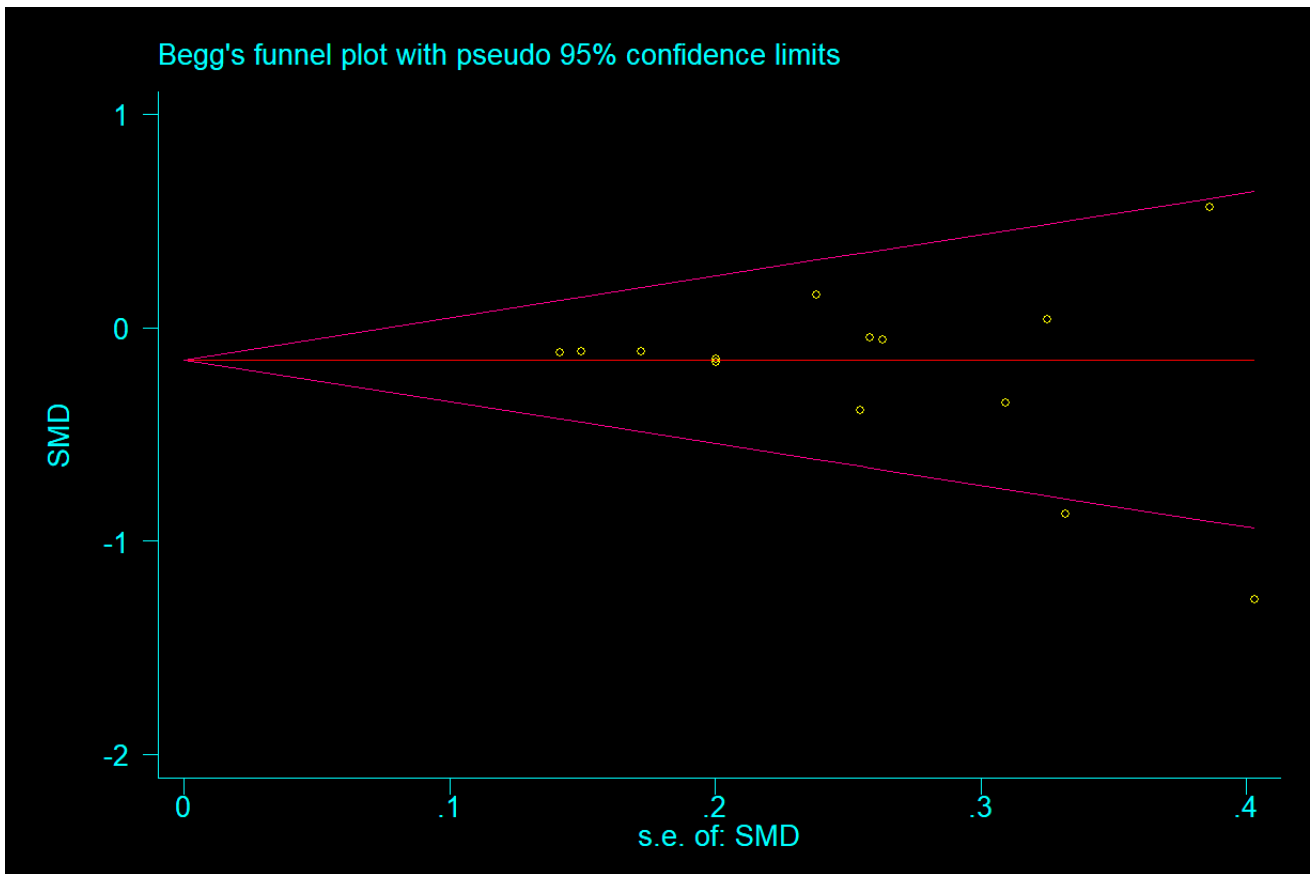

**Supplementary Figure 7.** Publication bias of the studies regarding the effect of periodontitis on MCV level.

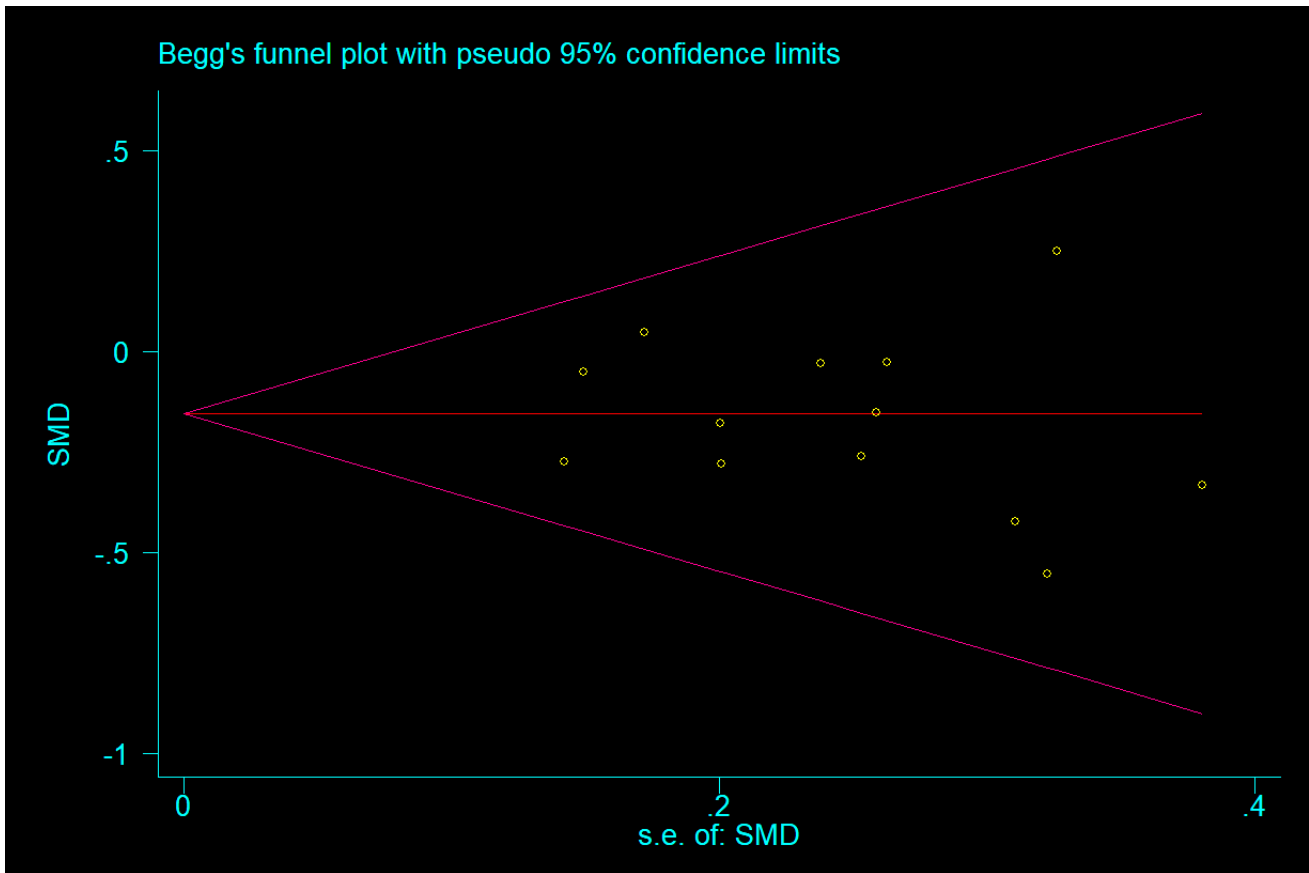

**Supplementary Figure 8.** Publication bias of the studies regarding the effect of periodontitis on MCH level.



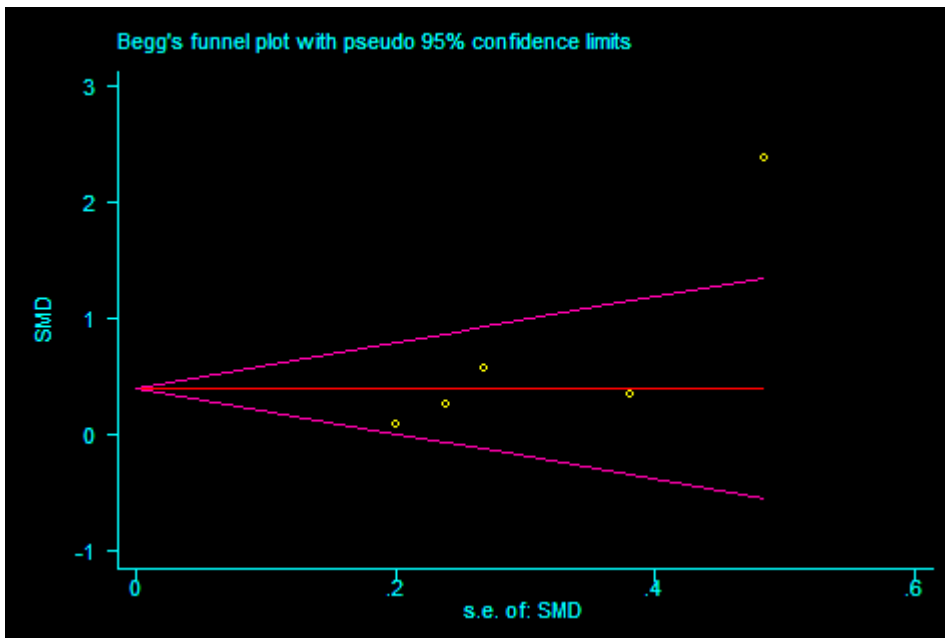

**Supplementary Figure 9.** Publication bias of the studies regarding the effect of periodontitis on ESR level.

**Supplementary Table 1.** Subgroup analysis of the association between periodontitis and anemia based on Hb level.

| <b>Subgroup</b>                  | <b>Number<br/>of subjects</b> | <b>SMD (95%CI)</b>   | <b>I<sup>2</sup></b> | <b>P value</b> |
|----------------------------------|-------------------------------|----------------------|----------------------|----------------|
| <b>Gender</b>                    |                               |                      |                      |                |
| Male                             | 7                             | -1.14(-2.05, -0.24)  | 94.8%                | 0.01           |
| Female                           | 3                             | -0.37(-0.83, 0.09)   | <b>63.7%</b>         | <b>0.11</b>    |
| Mix                              | 4                             | -0.33 (-0.53, -0.13) | 0.00%                | <0.01          |
| <b>Severity of periodontitis</b> |                               |                      |                      |                |
| CAL $\geq$ 5 mm                  | 5                             | -0.85(-1.57, -0.13)  | 91.0%                | 0.02           |
| BL $\geq$ 50%                    | 3                             | -0.33(-0.89, 0.22)   | <b>62.1%</b>         | <b>0.24</b>    |
| CAL $\geq$ 1 mm                  | 6                             | -0.75(-1.45, -0.05)  | 93.1%                | 0.04           |
| <b>Sample</b>                    |                               |                      |                      |                |
| <50                              | 5                             | -1.20(-2.16, -0.24)  | 88.1%                | 0.02           |
| $\geq$ 50                        | 9                             | -0.49(-0.93, -0.05)  | 90.9%                | 0.03           |
| Total                            | 11                            | -0.69(-1.09, -0.29)  | 89.8%                | <0.01          |

**Supplementary Table 2.** Subgroup analysis of the association between periodontitis and anemia based on RBC.

| <b>Subgroup</b>                  | <b>Number<br/>of subjects</b> | <b>SMD (95%CI)</b>  | <b>I<sup>2</sup></b> | <b>P value</b> |
|----------------------------------|-------------------------------|---------------------|----------------------|----------------|
| <b>Gender</b>                    |                               |                     |                      |                |
| Male                             | 6                             | -0.13(-0.69, 0.00)  | <b>63.9%</b>         | 0.05           |
| Female                           | 2                             | -0.08(-0.32, 0.16)  | 0.00%                | 0.51           |
| Mix                              | 3                             | -0.11(-0.31, -0.09) | 8.50%                | 0.27           |
| <b>Severity of periodontitis</b> |                               |                     |                      |                |
| CAL $\geq$ 5 mm                  | 5                             | -0.43(-0.78, -0.08) | <b>65.7%</b>         | <b>0.02</b>    |
| BL $\geq$ 50%                    | 3                             | -0.12(-0.45,0.22)   | 0.00%                | 0.50           |
| CAL $\geq$ 1 mm                  | 6                             | -0.06(-0.22, 0.11)  | 0.00%                | 0.51           |
| <b>Sample</b>                    |                               |                     |                      |                |
| <50                              | 3                             | -0.38(-0.83, 0.08)  | 66.3%                | 0.11           |
| $\geq$ 50                        | 8                             | -0.09(-0.28, -0.01) | 0.00%                | 0.16           |
| Total                            | 9                             | -0.16(-0.22, -0.04) | 34.0%                | 0.03           |

**Supplementary Table 3.** Subgroup analysis of the association between periodontitis and anemia based on MCV.

| Subgroup                         | Number<br>of<br>subjects | SMD (95%CI)          | I <sup>2</sup> | P<br>value |
|----------------------------------|--------------------------|----------------------|----------------|------------|
| <b>Gender</b>                    |                          |                      |                |            |
| Male                             | 7                        | -1.70 (-2.80, -0.59) | 96.1%          | <0.01      |
| Female                           | 3                        | -0.81 (-1.59, -0.04) | 85.7%          | 0.04       |
| Mix                              | 3                        | -0.23 (-0.51, -0.06) | 0.00%          | 0.12       |
| <b>Severity of periodontitis</b> |                          |                      |                |            |
| CAL $\geq$ 5 mm                  | 5                        | -1.11(-1.95, -0.26)  | 93.3%          | 0.01       |
| BL $\geq$ 50%                    | 3                        | -1.08(-2.64, -0.42)  | <b>69.3%</b>   | <0.01      |
| CAL $\geq$ 1 mm                  | 5                        | -1.17(-2.40, -0.06)  | 96.1%          | 0.06       |
| <b>Sample</b>                    |                          |                      |                |            |
| <50                              | 5                        | -1.73(-2.74, -0.73)  | 87.4%          | <0.01      |
| $\geq$ 50                        | 8                        | -0.79(-1.43, -0.14)  | 94.3%          | 0.04       |
| Total                            | 11                       | -1.13(-1.69, -0.57)  | 93.4%          | <0.01      |

**Supplementary Table 4.** Subgroup analysis of the association between periodontitis and anemia based on HCT.

| Subgroup                         | Number<br>of subjects | SMD (95%CI)         | I <sup>2</sup> | P value     |
|----------------------------------|-----------------------|---------------------|----------------|-------------|
| <b>Gender</b>                    |                       |                     |                |             |
| Male                             | 6                     | -0.14 (-0.34, 0.06) | 0.00%          | 0.18        |
| Female                           | 2                     | -0.01(-0.24, 0.23)  | 0.00%          | 0.97        |
| Mix                              | 3                     | -0.26(-0.45, -0.08) | 0.00%          | <0.01       |
| <b>Severity of periodontitis</b> |                       |                     |                |             |
| CAL $\geq$ 5 mm                  | 6                     | -0.10(-0.31, 0.10)  | 6.90%          | 0.32        |
| BL $\geq$ 50%                    | 3                     | -0.12(-0.48,0.23)   | 11.3%          | 0.50        |
| CAL $\geq$ 1 mm                  | 4                     | -0.20(-0.37, -0.04) | 0.00%          | 0.02        |
| <b>Sample</b>                    |                       |                     |                |             |
| <50                              | 3                     | -0.19(-0.47, 0.09)  | 6.10%          | 0.16        |
| $\geq$ 50                        | 8                     | -0.15(-0.28, -0.01) | <b>0.00%</b>   | <b>0.03</b> |
| Total                            | 9                     | -0.15(-0.27, -0.04) | 0.00%          | <0.01       |

**Supplementary Table 5.** Subgroup analysis of the association between periodontitis and anemia based on MCH.

| <b>Subgroup</b>                  | <b>Number</b> | <b>SMD (95%CI)</b>  | <b>I<sup>2</sup></b> | <b>P value</b>  |
|----------------------------------|---------------|---------------------|----------------------|-----------------|
| <b>of subjects</b>               |               |                     |                      |                 |
| <b>Gender</b>                    |               |                     |                      |                 |
| Male                             | 7             | -1.31(-2.14, -0.48) | 93.8%                | <0.01           |
| Female                           | 3             | -0.29(-0.62, 0.05)  | <b>36.5%</b>         | <b>0.10</b>     |
| Mix                              | 5             | -0.34(-0.74, 0.07)  | 73%                  | 0.10            |
| <b>Severity of periodontitis</b> |               |                     |                      |                 |
| CAL $\geq$ 5 mm                  | 5             | -0.93(-1.66, -0.19) | 91.3%                | 0.01            |
| BL $\geq$ 50%                    | 3             | -0.69(-1.03, -0.35) | <b>0.00%</b>         | <b>&lt;0.01</b> |
| CAL $\geq$ 1 mm                  | 7             | -0.71(-1.39, -0.02) | 93.3%                | 0.04            |
| <b>Sample</b>                    |               |                     |                      |                 |
| <50                              | 7             | -1.04(-1.61, -0.47) | 80.2%                | <0.01           |

---

|           |     |                      |       |       |
|-----------|-----|----------------------|-------|-------|
| $\geq 50$ | 8   | -0.55(-1.07, -0.03)  | 92.7% | 0.04  |
| Total     | 12* | -0.76 (-1.15, -0.37) | 89.9% | <0.01 |

---
